# Supplementary material for: Febrile Neutropenia Duration Is Associated with the Severity of Gut Microbiota Dysbiosis in Pediatric Allogeneic Hematopoietic Stem Cell Transplantation Recipients
Source: MDPI journal article supplement (doi:10.3390/cancers14081932), 2022-04-12
Supplement: s1 [file s1]

*Article*

# Febrile neutropenia duration is associated with the severity of gut microbiota dysbiosis in pediatric allogeneic hematopoietic stem cell transplantation recipients

**Riccardo Masetti<sup>1,2\*</sup>, Federica D'Amico<sup>2,3\*</sup>, Daniele Zama<sup>2,4</sup>, Davide Leardini<sup>1†</sup>, Edoardo Muratore<sup>1</sup>, Marek Ussowicz<sup>5</sup>, Jowita Fraczekiewicz<sup>5</sup>, Simone Cesaro<sup>6</sup>, Giulia Caddeo<sup>6</sup>, Vincenza Pezzella<sup>6</sup>, Tamara Belotti<sup>1</sup>, Francesca Gottardi<sup>1</sup>, Piero Tartari<sup>1</sup>, Patrizia Brigidi<sup>2</sup>, Silvia Turrone<sup>3\*</sup> and Arcangelo Prete<sup>1\*</sup>**

<sup>1</sup> Pediatric Oncology and Hematology “Lalla Seràgnoli”, IRCCS Azienda Ospedaliero-Universitaria di Bologna, 40138 Bologna, Italy: riccardo.masetti5@unibo.it (R.M.), davide.learadini3@studio.unibo.it (D.L.), edoardo.muratore@studio.unibo.it (E.M.), tamara.belotti@aosp.bo.it (T.B.), francescag.ageop@aosp.bo.it (F. G.), piero.tartari@aosp.bo.it (P.T.), arcangelo.prete@aosp.bo.it (A.P.);

<sup>2</sup> Department of Medical and Surgical Sciences (DIMEC), University of Bologna, 40138 Bologna, Italy: federica.damico8@unibo.it (F.D.), patrizia.brigidi@unibo.it (P.B.);

<sup>3</sup> Department of Pharmacy and Biotechnology (FABIT), University of Bologna, 40126 Bologna, Italy: silvia.turrone@unibo.it (S.T.);

<sup>4</sup> Pediatric Emergency Unit, IRCCS Azienda Ospedaliero-Universitaria di Bologna, 40138 Bologna, Italy: daniele.zama2@unibo.it (D.Z.);

<sup>5</sup> Department and Clinic of Pediatric Oncology, Hematology and Bone Marrow Transplantation, Wrocław Medical University, 50-556 Wrocław, Poland: usowicz@o2.pl (M.U.), jowita.fraczekiewicz@umed.wroc.pl (J.F.);

<sup>6</sup> Department of Pediatric Hematology Oncology, Azienda Ospedaliera Universitaria Integrata, 37126 Verona, Italy: simone.cesaro@aovr.veneto.it (S.C.), giulia.caddeo@aovr.veneto.it (G.C.), vincenza.pezzella@aovr.veneto.it (V.P.)

<sup>†</sup> Correspondence: davide.learadini3@studio.unibo.it; Tel.: +39 051 214 4665, Pediatric Oncology and Hematology “Lalla Seràgnoli”, IRCCS Azienda Ospedaliero-Universitaria di Bologna, Via Giuseppe Massarenti 11, 40138 Bologna, Italy;

\* R.M. and F.D. contributed equally to this work as co-first authors. S.T. and A.P. contributed equally to this work as co-last authors.

**Supplementary Table S1: Detailed summary of infections in the two patient groups.** Each isolated pathogen is categorized following the Common Commensal tab of the NHSN Organisms List: CC - Organisms categorized as Common Commensals, MBI - Organisms categorized for Mucosal Barrier Injury, UTI - Organisms categorized for Urinary Tract Infection

| Code     | Group   | BSI | Bacterial pathogen                           | Fungi | Viruses | Viral pathogen |
|----------|---------|-----|----------------------------------------------|-------|---------|----------------|
| BO_FN_01 | >3 days | Yes | <i>Micrococcus luteus</i> (CC,UTI)           | No    | No      |                |
| BO_FN_02 | >3 days | Yes | <i>Streptococcus oralis</i> (CC,MBI,UTI)     | No    | Yes     | HHV6           |
| BO_FN_03 | >3 days | No  |                                              | Yes   | Yes     | CMV            |
| BO_FN_04 | ≤3 days | No  |                                              | No    | No      |                |
| BO_FN_05 | >3 days | No  |                                              | No    | No      |                |
| BO_FN_06 | ≤3 days | No  |                                              | No    | No      |                |
| BO_FN_11 | ≤3 days | No  |                                              | No    | Yes     | CMV            |
| BO_FN_13 | >3 days | No  |                                              | No    | Yes     | BK, Adenovirus |
| BO_FN_14 | >3 days | No  |                                              | No    | Yes     | CMV            |
| BO_FN_15 | ≤3 days | No  |                                              | No    | Yes     | CMV            |
| BO_FN_16 | >3 days | Yes | <i>Streptococcus dysgalactiae</i> (UTI)      | No    | Yes     | BK             |
| BO_FN_17 | >3 days | Yes | MSSA (UTI)                                   | No    | Yes     | CMV            |
| BR_FN_01 | ≤3 days | No  |                                              | No    | No      |                |
| BR_FN_02 | ≤3 days | No  |                                              | No    | No      |                |
| BR_FN_03 | ≤3 days | No  |                                              | No    | No      |                |
| BR_FN_04 | ≤3 days | No  |                                              | No    | No      |                |
| BR_FN_05 | >3 days | No  |                                              | No    | No      |                |
| BR_FN_07 | ≤3 days | Yes | <i>Staphylocococcus hominis</i> MRS (CC,UTI) | No    | No      |                |
| BR_FN_08 | ≤3 days | Yes | <i>Proteus mirabilis</i> (MBI,UTI)           | No    | No      |                |
| BR_FN_11 | ≤3 days | No  |                                              | No    | No      |                |
| BR_FN_12 | ≤3 days | No  |                                              | No    | No      |                |
| BR_FN_13 | >3 days | No  |                                              | Yes   | No      |                |
| BR_FN_14 | ≤3 days | No  |                                              | No    | No      |                |
| BR_FN_15 | >3 days | No  |                                              | Yes   | No      |                |
| BR_FN_17 | >3 days | No  |                                              | Yes   | No      |                |
| VR_FN_01 | ≤3 days | No  |                                              | No    | No      |                |
| VR_FN_02 | ≤3 days | No  |                                              | No    | No      |                |
| VR_FN_03 | ≤3 days | No  |                                              | No    | No      |                |
| VR_FN_05 | >3 days | No  |                                              | No    | Yes     | CMV            |
| VR_FN_07 | ≤3 days | No  |                                              | No    | No      |                |
| VR_FN_08 | >3 days | No  |                                              | No    | No      |                |
| VR_FN_09 | ≤3 days | No  |                                              | No    | No      |                |
| VR_FN_10 | ≤3 days | No  |                                              | No    | No      |                |
| VR_FN_11 | >3 days | No  |                                              | Yes   | No      |                |
| VR_FN_12 | ≤3 days | Yes | <i>Pseudomonas aeruginosa</i> (UTI)          | No    | No      |                |
| VR_FN_13 | ≤3 days | No  |                                              | No    | No      |                |
| VR_FN_14 | >3 days | No  |                                              | No    | Yes     | CMV            |

**Supplementary Table S2: Detailed summary of administered antibiotics.**

[illegible]

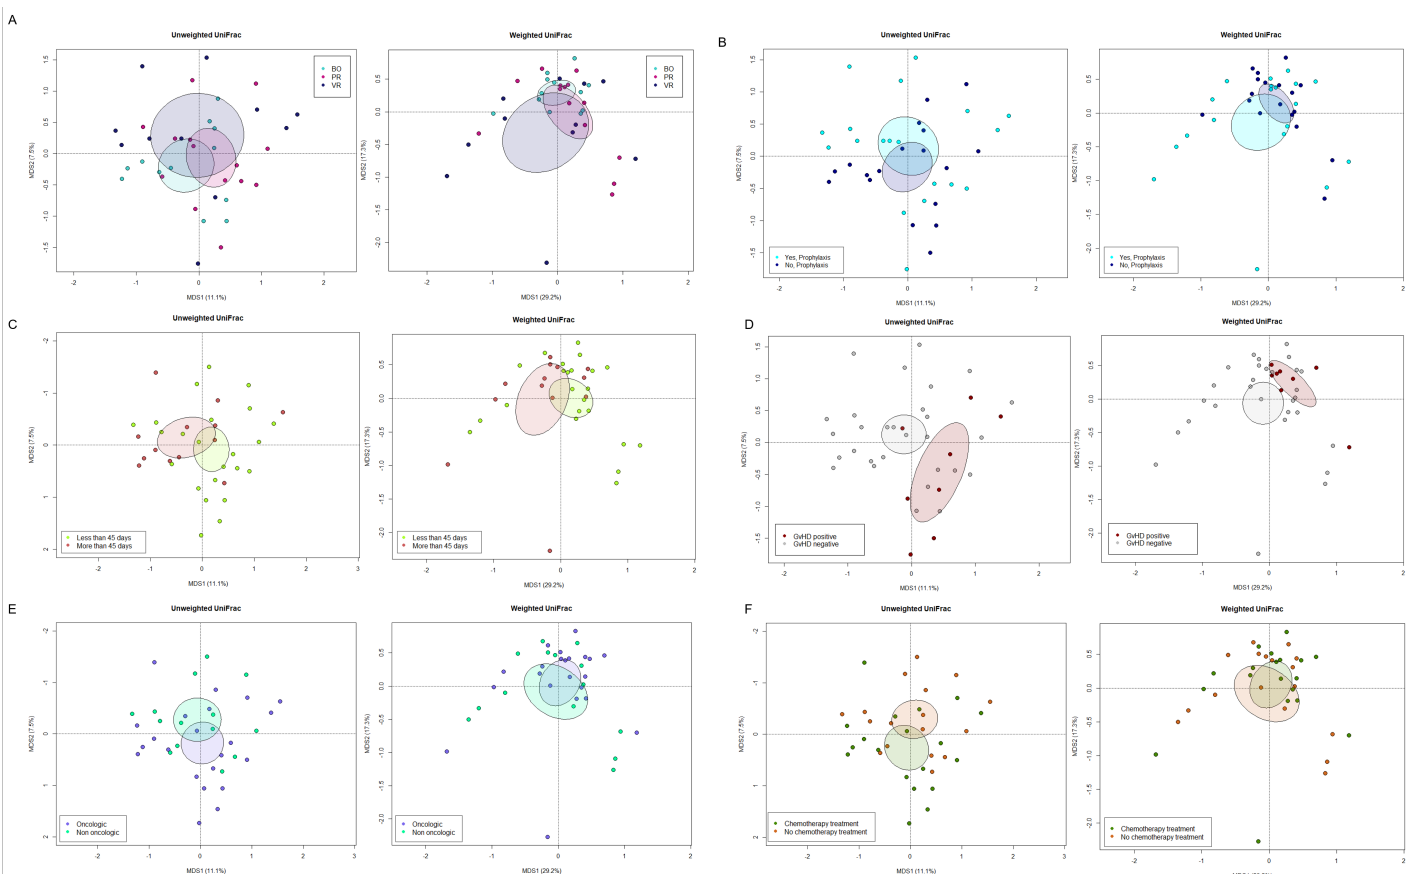

**Supplementary Figure S1. Baseline gut microbiota diversity in pediatric allo-HSCT patients who developed febrile neutropenia.** PCoA based on unweighted (left) and weighted (right) UniFrac distances between the gut microbiota profiles of samples collected before transplant and stratified by transplant center (Bologna, BO vs. Verona, VR vs. Wroclaw, PR, A), antibiotic prophylaxis (yes vs. no, B), repeated antibiotic therapies (less vs. more than 45 days before sampling, C), GvHD development (positive vs. negative, D), underlying disease (oncologic vs. non-oncologic, E) and previous chemotherapy cycles (yes vs. no, F). Ellipses include 95% confidence area based on the standard error of the weighted average of sample coordinates. No significant separation between groups was found (permutation test with pseudo-F ratio,  $p \geq 0.08$ ). The 45-day cut-off for previous antibiotic therapies was chosen based on Palleja et al., 2018.

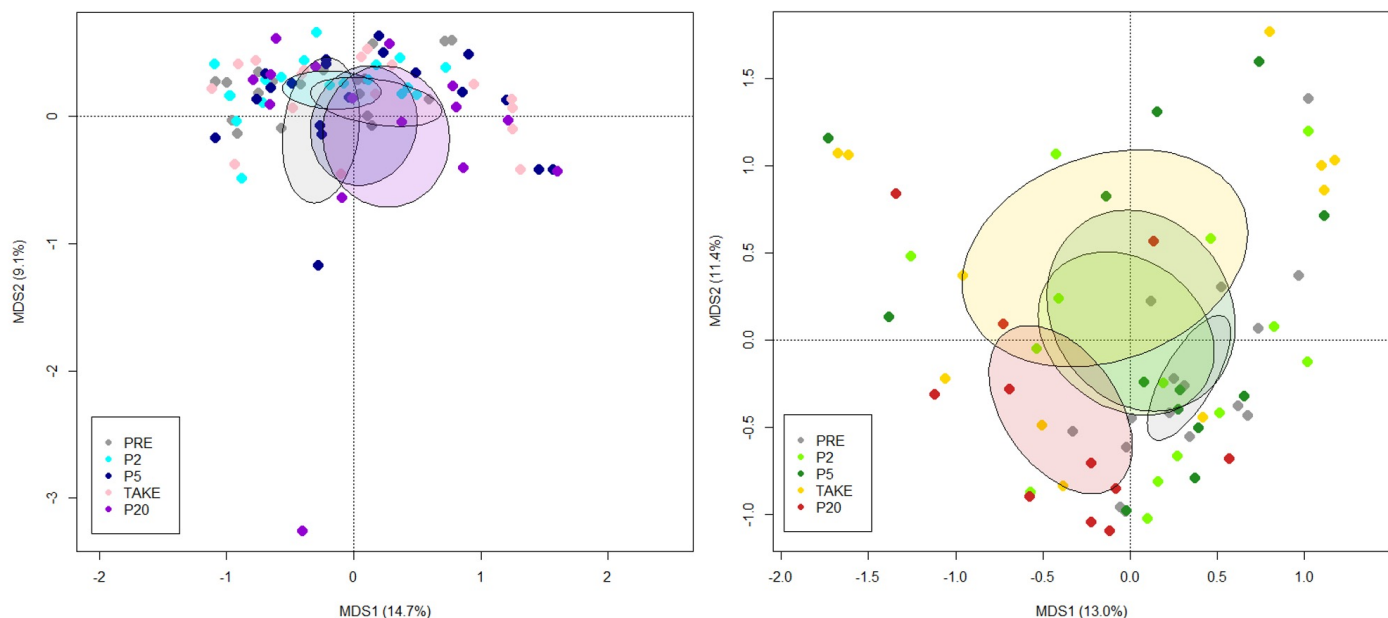

**Supplementary Figure S2. Beta diversity of the gut microbiota in pediatric allo-HSCT patients with different duration of febrile neutropenia.** PCoA based on unweighted UniFrac distances between the gut microbiota profiles of samples collected before transplant (PRE), at the onset of neutropenia (day -2/+2; P2), at the onset of fever (day +4/+5; P5), at engraftment (TAKE) and after engraftment (day +20/+30; P20), in pediatric allo-HSCT patients with less (left) and more (right) than three days of fever. Ellipses include 95%confidence area based on the standard error of the weighted average of sample coordinates. Significant separation among groups was found only for patients with longer fever duration (permutation test with pseudo-F ratio,  $p = 0.05$ ).

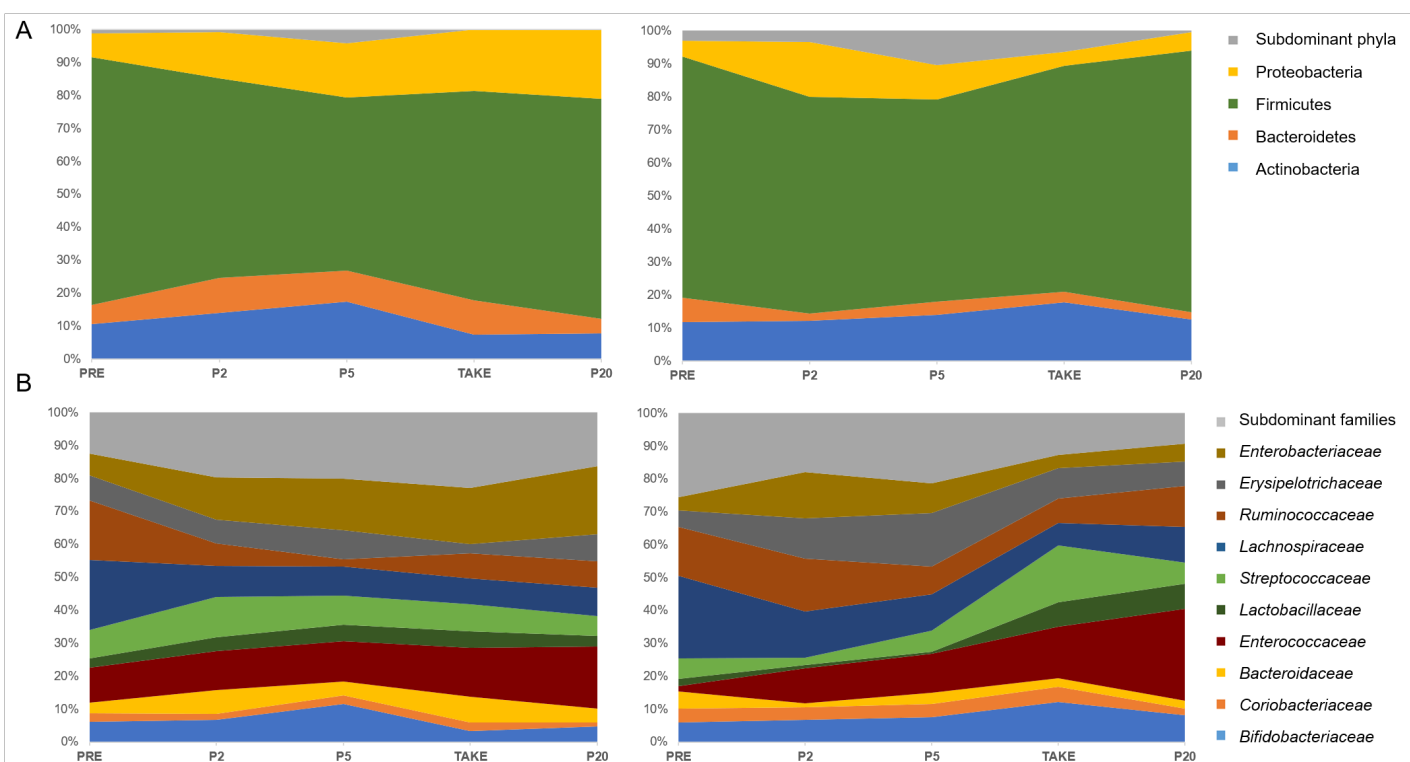

**Supplementary Figure S3. Gut microbiota trajectory in pediatric allo-HSCT patients with different duration of febrile neutropenia.** Area plots representing the relative abundance of the major phyla (A) and families (B) in the GM of patients with less (left) and more (right) than three days of fever. Only taxa with mean relative abundance > 20% in at least five samples of the total dataset are shown. PRE, before transplant; P2, at the onset of neutropenia (day -2/+2); P5, at the onset of fever (day +4/+5); TAKE, at engraftment; P20, after engraftment (day +20/+30).

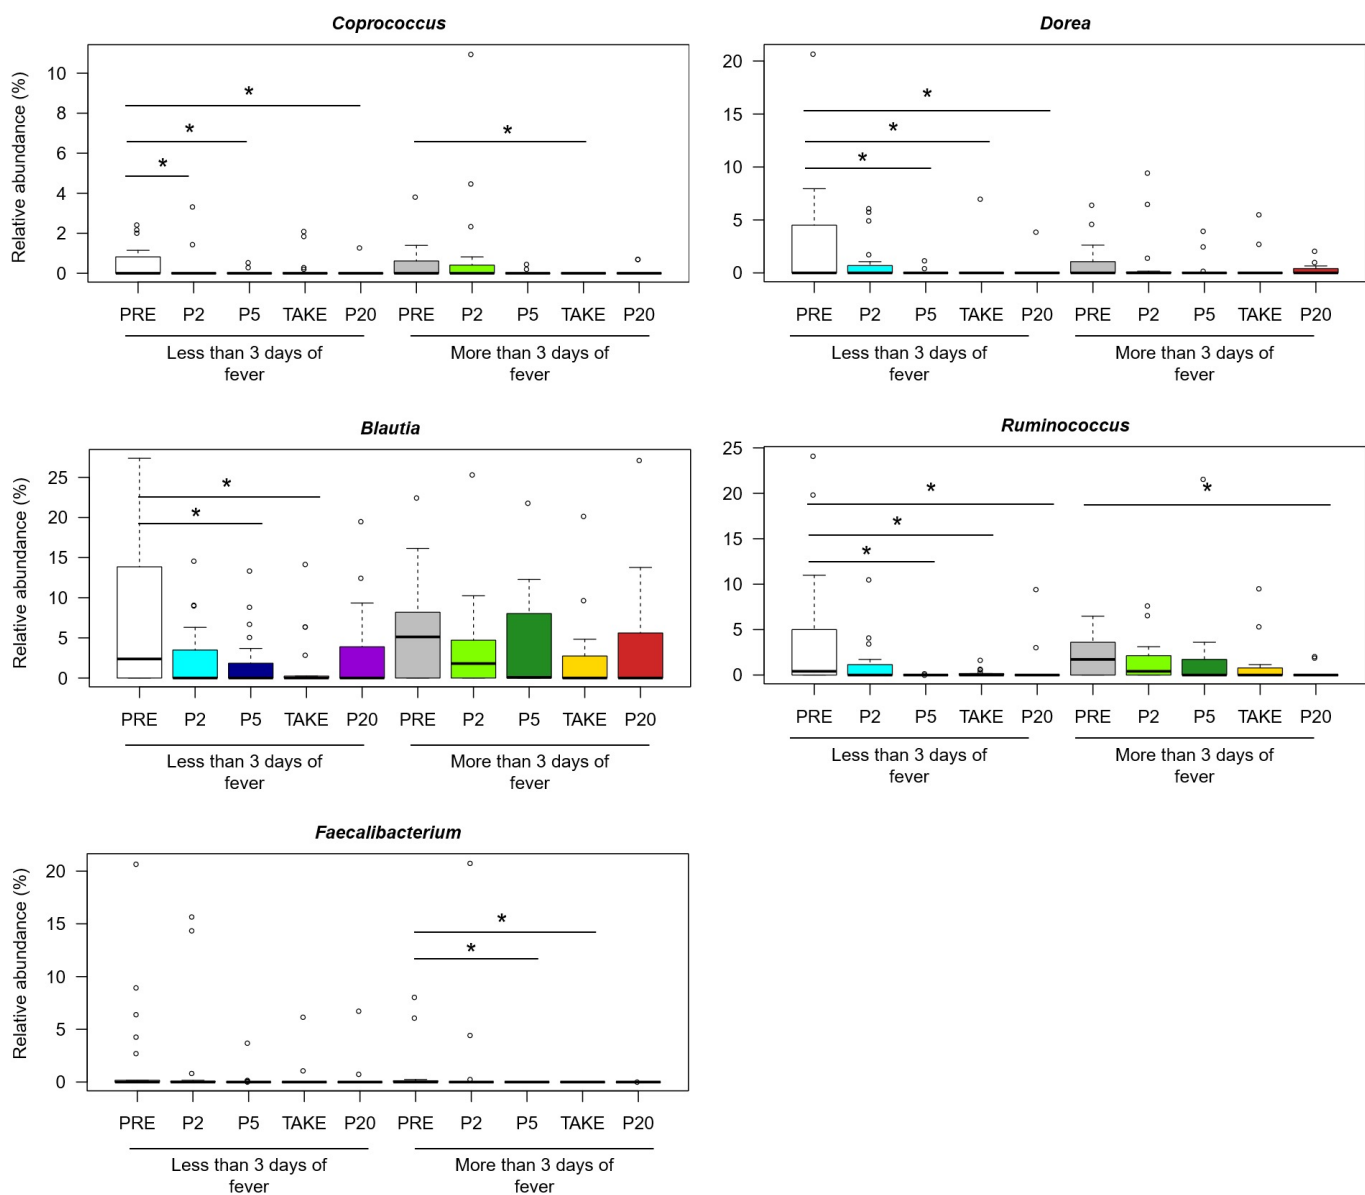

**Supplementary Figure S4. Dynamics of typical health-associated taxa in pediatric allo-HSCT patients with different duration of febrile neutropenia.** Boxplots showing the relative abundance distribution of typical health-associated genera significantly differentially represented over time in patients with different duration of fever (*i.e.*, less vs. more than three days of fever). Wilcoxon test, \* for  $p < 0.05$ .

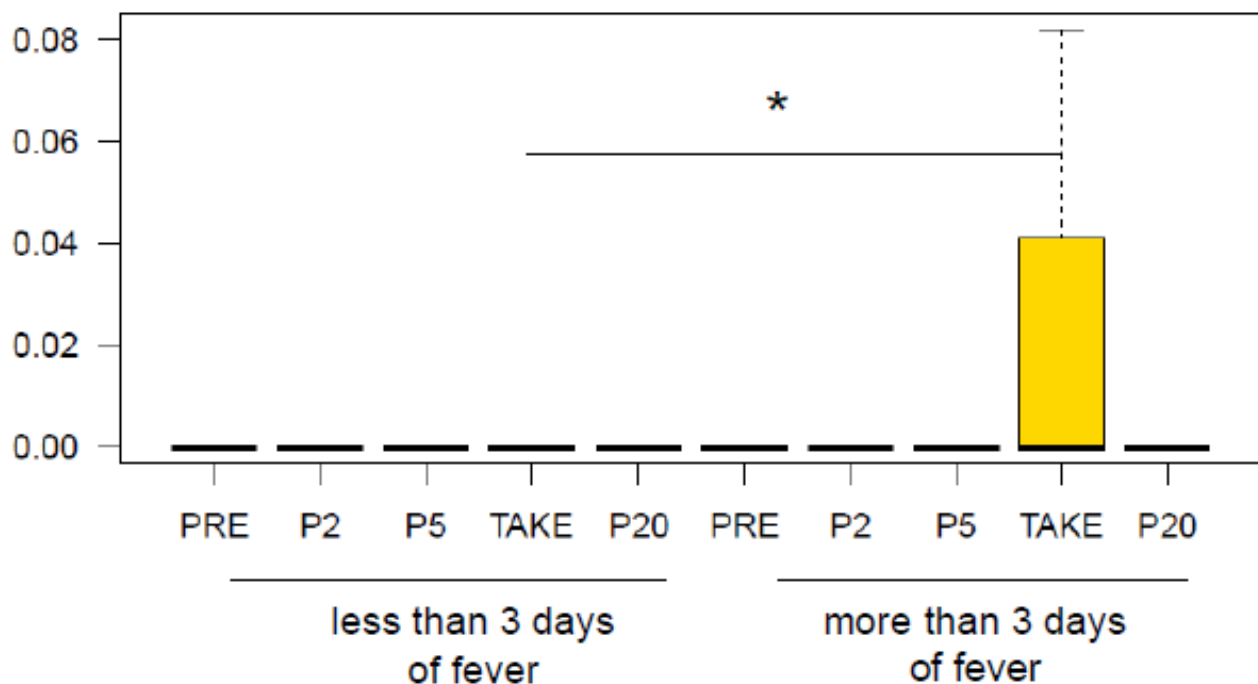

**Supplementary Figure S5. Boxplots showing the relative abundance distribution of *Akkermansia* in patients with different duration of febrile neutropenia (less vs. more than three days).** PRE, before transplant; P2, at the onset of neutropenia (day -2/+2); P5, at the onset of fever (day +4/+5); TAKE, at engraftment; P20, after engraftment (day +20/+30). Wilcoxon test, \* for  $p < 0.05$ .
